# Supplementary material for: Old Lineages in a New Ecosystem: Diversification of Arcellinid Amoebae (Amoebozoa) and Peatland Mosses
Source: PLoS One. 2014 Apr 24;9(4):e95238. doi: 10.1371/journal.pone.0095238 (PMC3999201; doi:10.1371/journal.pone.0095238)
Supplement: Table S1 — List of the Hyalospheniidae single cells from which COI sequences were obtained. (XLS) [file pone.0095238.s002.xls]

## Sheet: Sheet1
Table S1 List of the Hyalospheniidae single cells from which COI sequences were obtained.
Taxa	Sequence titles	Genbank number	Latitude	Longitude	Sampling location	Country	Habitat from which the sequenced specimen were isolated
Arcella sp.	New_414	KJ544162	46.55	6.23	Amburnex	Switzerland	Sphagnum moss
Arcella sp.	New_445	KJ544163	50.52	-3.95	Dartmoor	United Kingdom	Sphagnum moss
Hyalosphenia papilio	New_1096	KJ544147	48.59	-64.31	Rang-Saint-Paul	Canada	Sphagnum moss
Hyalosphenia papilio	New_1097	KJ544148	48.59	-64.31	Rang-Saint-Paul	Canada	Sphagnum moss
Hyalosphenia papilio	New_1098	KJ544149	48.59	-64.31	Rang-Saint-Paul	Canada	Sphagnum moss
Hyalosphenia papilio	New_1099	KJ544150	48.59	-64.31	Rang-Saint-Paul	Canada	Sphagnum moss
Hyalosphenia papilio	New_1107	KJ544151	48.3	-64.71	L'Anse aux Canards	Canada	Sphagnum moss
Hyalosphenia papilio	New_1108	KJ544152	48.3	-64.71	L'Anse aux Canards	Canada	Sphagnum moss
Hyalosphenia papilio	New_1109	KJ544153	48.3	-64.71	L'Anse aux Canards	Canada	Sphagnum moss
Hyalosphenia papilio	New_1111	KJ544154	46.55	7.2	Gros Mont	Switzerland	Sphagnum moss
Hyalosphenia papilio	New_1113	KJ544155	46.55	7.2	Gros Mont	Switzerland	Sphagnum moss
Nebela collaris	New_295	KJ544161	52.01	104.66	Near Baikal Lake	Russia	Sphagnum moss
Nebela flabellulum	New_1140	KJ544158	49.36	-123.01	Near Race Lake, Lynn Valley	Canada	Soil litter
Nebela flabellulum	New_1141	KJ544159	49.36	-123.01	Near Race Lake, Lynn Valley	Canada	Soil litter
Nebela marginata	New_1120	KJ544156	46.55	7.2	Gros Mont	Switzerland	Sphagnum moss
Nebela marginata	New_1121	KJ544157	46.55	7.2	Gros Mont	Switzerland	Sphagnum moss
Nebela marginata	New_1152	KJ544160	46.55	7.2	Gros Mont	Switzerland	Sphagnum moss
Nebela sp.	New_1181	KJ544164	49.36	-123.01	Near Race Lake, Lynn Valley	Canada	Soil litter
